# Supplementary material for: Adverse pregnancy outcomes and long term risk of ischemic heart disease in mothers: national cohort and co-sibling study
Source: PubMed Central journal article supplement — BMJ. 2023 Feb 1;380:e072112. doi: 10.1136/bmj-2022-072112 (PMC9890184; doi:10.1136/bmj-2022-072112), 2023-02-01
Supplement: cruc072112.ww.pdf [file cruc072112.ww.pdf]

## SUPPLEMENTAL MATERIAL

### Contents

|                                                                                                                                                                                                  |         |
|--------------------------------------------------------------------------------------------------------------------------------------------------------------------------------------------------|---------|
| <b>Supplemental Results.</b> Secondary and sensitivity analyses.                                                                                                                                 | Page 3  |
| <b>Supplemental Table 1.</b> ICD codes for and frequency of adverse pregnancy outcomes, other ischemic heart disease risk factors, and ischemic heart disease.                                   | Page 4  |
| <b>Supplemental Table 2.</b> Prevalences of combinations of adverse pregnancy outcomes.                                                                                                          | Page 5  |
| <b>Supplemental Table 3.</b> Associations between number of adverse pregnancy outcomes and subsequent risk of ischemic heart disease.                                                            | Page 6  |
| <b>Supplemental Table 4.</b> Summary of interaction results.                                                                                                                                     | Page 7  |
| <b>Supplemental Table 5.</b> Interactions between preterm delivery and preeclampsia (1973-2015) in relation to risk of ischemic heart disease through 2018, Sweden.                              | Page 8  |
| <b>Supplemental Table 6.</b> Interactions between preterm delivery and other hypertensive disorders of pregnancy (1973-2015) in relation to risk of ischemic heart disease through 2018, Sweden. | Page 9  |
| <b>Supplemental Table 7.</b> Interactions between preterm delivery and gestational diabetes (1973-2015) in relation to risk of ischemic heart disease through 2018, Sweden.                      | Page 10 |
| <b>Supplemental Table 8.</b> Interactions between preeclampsia and gestational diabetes (1973-2015) in relation to risk of ischemic heart disease through 2018, Sweden.                          | Page 11 |
| <b>Supplemental Table 9.</b> Associations between adverse pregnancy outcomes and subsequent risk of ischemic heart disease within 10 years following delivery,                                   | Page 12 |

stratified on calendar year of delivery.

**Supplemental Figure 1.** Log-log plots for associations between adverse pregnancy outcomes and subsequent risk of ischemic heart disease at 0-46 years of follow-up. Page 13

**Supplemental Figure 2.** Cumulative incidence of ischemic heart disease at 0-46 years of follow-up associated with specific adverse pregnancy outcomes. Page 14

## Supplemental Results.

### Secondary Analyses.

In secondary analyses that examined associations between adverse pregnancy outcomes and ischemic heart disease subtypes, all HRs were higher for acute myocardial infarction but were also significantly elevated for angina. For example, associations between specific adverse pregnancy outcomes and risk of acute myocardial infarction or angina, respectively, at 0-46 years after delivery were: preterm delivery, 1.48 (95% CI, 1.43 to 1.54) vs. 1.32 (1.29 to 1.36); small for gestational age delivery, 1.38; (1.34 to 1.42) vs. 1.15 (1.13 to 1.18); preeclampsia, 1.49 (1.44 to 1.55) vs. 1.41 (1.37 to 1.45); other hypertensive disorders, 1.76 (1.59 to 1.94) vs. 1.56 (1.45 to 1.68); gestational diabetes, 1.73 (1.60 to 1.86) vs. 1.48 (1.39 to 1.57).

When restricting to women with a first delivery in 1990 or later (N=1,226,286), most HRs for ischemic heart disease were similar to those from the main analyses, except that the association between small for gestational age delivery and ischemic heart disease was no longer significant. For example, the adjusted HRs for ischemic heart disease at 0-46 years after delivery associated with specific adverse pregnancy outcomes among women with a first delivery in 1990 or later vs. the main model, respectively, were: preterm delivery, 1.40 (95% CI, 1.31 to 1.48) vs. 1.33 (1.30 to 1.37); small for gestational age delivery, 1.01 (0.95 to 1.07) vs. 1.18; (1.16 to 1.20); preeclampsia, 1.45 (1.35 to 1.56) vs. 1.39 (1.37 to 1.42); other hypertensive disorders, 1.69 (1.53 to 1.87) vs. 1.56 (1.47 to 1.65); gestational diabetes, 1.17 (1.04 to 1.31) vs. 1.45 (1.38 to 1.52).

### Sensitivity Analyses.

In sensitivity analyses, all results were similar to the main results and the conclusions were unchanged. For example, when restricting to women with complete data as an alternative to multiple imputation, the adjusted HRs for ischemic heart disease at 0-46 years after delivery associated with specific adverse pregnancy outcomes were: 1.37 (95% CI, 1.32 to 1.42) for preterm delivery, 1.11 (1.08 to 1.15) for small for gestational age delivery, 1.40 (1.34 to 1.46) for preeclampsia, 1.61 (1.50 to 1.74) for other hypertensive disorders, and 1.20 (1.10 to 1.31) for gestational diabetes ( $P<0.001$  for each). When coding missing data as a separate category, the corresponding HRs were 1.32 (95% CI, 1.29 to 1.35), 1.17 (1.15 to 1.19), 1.41 (1.38 to 1.44), 1.59 (1.50 to 1.69), and 1.45 (1.38 to 1.52) ( $P<0.001$  for each). In addition, the corresponding HRs when repeating the main analyses while restricting to each woman's first delivery were 1.27 (95% CI, 1.22 to 1.32), 1.22 (1.19 to 1.25), 1.41 (1.36 to 1.45), 1.70 (1.50 to 1.92), and 1.80 (1.67 to 1.94) ( $P<0.001$  for each).

As an alternative to censoring at death, competing risks models that accounted for death as a competing event yielded nearly identical results, due in part to the small number of deaths (3.0% of participants) in this relatively young cohort of women. For example, the adjusted HRs for ischemic heart disease at 0-46 years after delivery associated with specific adverse pregnancy outcomes in the competing risks model vs. main model, respectively, were: preterm delivery, 1.32 (95% CI, 1.29 to 1.36) vs. 1.33 (1.30 to 1.37); small for gestational age delivery, 1.18 (1.16 to 1.21) vs. 1.18; (1.16 to 1.20); preeclampsia, 1.38 (1.35 to 1.41) vs. 1.39 (1.37 to 1.42); other hypertensive disorders, 1.54 (1.45 to 1.63) vs. 1.56 (1.47 to 1.65); gestational diabetes, 1.44 (1.37 to 1.51) vs. 1.45 (1.38 to 1.52).

**Supplemental Table 1. ICD codes for and frequency of adverse pregnancy outcomes, other ischemic heart disease risk factors, and ischemic heart disease.**

|                                        | <i>ICD-8</i> | <i>ICD-9</i>                | <i>ICD-10</i>              | n (%)          |
|----------------------------------------|--------------|-----------------------------|----------------------------|----------------|
| <b>APOs</b>                            |              |                             |                            |                |
| Preterm delivery <sup>a</sup>          | --           | --                          | --                         | 194,751 (8.8)  |
| Small for gestational age <sup>a</sup> | --           | --                          | --                         | 314,605 (14.3) |
| Preeclampsia                           | 637          | 624.4-624.7                 | O14-O15                    | 132,543 (6.0)  |
| Other hypertensive disorders           | 400-404      | 401-405, 642.0-642.3, 642.9 | I10-I15, O10-O11, O13, O16 | 34,186 (1.6)   |
| Gestational diabetes                   | --           | 648.0, 648.8                | O24                        | 36,269 (1.7)   |
| <b>Risk factors at baseline</b>        |              |                             |                            |                |
| Hypertension                           | 400-404      | 401-405                     | I10-I15                    | 2,966 (0.1)    |
| Diabetes                               | 250          | 250                         | E10-E14                    | 10,045 (0.5)   |
| Hyperlipidemia <sup>b</sup>            | 272          | 272                         | E78                        | 1,826 (0.1)    |
| <b>IHD (any)</b>                       |              |                             |                            |                |
| Acute myocardial infarction            | 410-414      | 410-414                     | I20-I25                    | 83,881 (3.8)   |
| Acute myocardial infarction            | 410          | 410                         | I21-I23                    | 46,386 (2.1)   |
| Angina pectoris                        | 413          | 413                         | I-20                       | 32,462 (1.5)   |
| Other acute IHD                        | 411          | 411                         | I-24                       | 671 (<0.1)     |
| Other chronic IHD                      | 412, 414     | 412, 414                    | I-25                       | 4,362 (0.2)    |

<sup>a</sup>Preterm delivery (<37 completed weeks) and small for gestational age (infant birth weight <10th percentile for gestational age) were identified based on reported gestational age at birth and birth weight in the Swedish Medical Birth Register.

<sup>b</sup>Hyperlipidemia was identified based on the diagnoses specified and/or prescription of lipid-modifying medications (Anatomical Therapeutic Chemical Classification System code C10) in the Swedish Pharmacy Register, which includes all prescriptions dispensed nationwide since July 1, 2005.

APO = adverse pregnancy outcome, *ICD* = *International Classification of Diseases*, IHD = ischemic heart disease

**Supplemental Table 2. Prevalence of combinations of adverse pregnancy outcomes.**

|            |                | <b>SGA</b>   | <b>PEC</b>   | <b>OHD</b>   | <b>GD</b>    |
|------------|----------------|--------------|--------------|--------------|--------------|
|            |                | <b>n (%)</b> | <b>n (%)</b> | <b>n (%)</b> | <b>n (%)</b> |
| <b>PTD</b> | Ever           | 31,822 (1.4) | 25,451 (1.2) | 5,269 (0.2)  | 10,368 (0.5) |
|            | Same pregnancy | 10,329 (0.5) | 13,151 (0.6) | 2,064 (0.1)  | 5,999 (0.3)  |
| <b>SGA</b> | Ever           | --           | 28,602 (1.3) | 7,037 (0.3)  | 5,138 (0.2)  |
|            | Same pregnancy | --           | 12,009 (0.5) | 3,150 (0.1)  | 2,465 (0.1)  |
| <b>PEC</b> | Ever           |              | --           | 4,651 (0.2)  | 4,033 (0.2)  |
|            | Same pregnancy |              | --           | 0 (0.0)      | 2,291 (0.1)  |
| <b>OHD</b> | Ever           |              |              | --           | 1,373 (0.1)  |
|            | Same pregnancy |              |              | --           | 912 (<0.1)   |

GD = gestational diabetes, OHD = other hypertensive disorders of pregnancy, PEC = preeclampsia, PTD = preterm delivery, SGA = small for gestational age delivery

**Supplemental Table 3. Associations between number of adverse pregnancy outcomes and subsequent risk of ischemic heart disease.**

|                                          | IHD cases | Rate <sup>a</sup> | HR (95% CI) <sup>b</sup> | P      |
|------------------------------------------|-----------|-------------------|--------------------------|--------|
| <b>0-46 years after first delivery</b>   |           |                   |                          |        |
| 0 APOs                                   | 50,574    | 136.0             | Reference                |        |
| 1 APO                                    | 22,959    | 186.6             | 1.24 (1.22, 1.26)        | <0.001 |
| 2 APOs                                   | 7,001     | 229.0             | 1.46 (1.43, 1.50)        | <0.001 |
| ≥3 APOs                                  | 3,347     | 308.2             | 1.75 (1.69, 1.82)        | <0.001 |
| Per each additional APO                  |           |                   | 1.21 (1.20, 1.22)        | <0.001 |
| <b>&lt;10 years after first delivery</b> |           |                   |                          |        |
| 0 APOs                                   | 2,183     | 14.8              | Reference                |        |
| 1 APO                                    | 876       | 19.9              | 1.29 (1.19, 1.39)        | <0.001 |
| 2 APOs                                   | 309       | 34.1              | 1.80 (1.59, 2.03)        | <0.001 |
| ≥3 APOs                                  | 151       | 58.4              | 2.26 (1.89, 2.70)        | <0.001 |
| Per each additional APO                  |           |                   | 1.32 (1.26, 1.38)        | <0.001 |
| <b>10-19 years after first delivery</b>  |           |                   |                          |        |
| 0 APOs                                   | 6,067     | 58.2              | Reference                |        |
| 1 APO                                    | 2,784     | 79.7              | 1.33 (1.27, 1.39)        | <0.001 |
| 2 APOs                                   | 975       | 102.6             | 1.73 (1.61, 1.85)        | <0.001 |
| ≥3 APOs                                  | 531       | 145.0             | 2.07 (1.88, 2.28)        | <0.001 |
| Per each additional APO                  |           |                   | 1.30 (1.27, 1.33)        | <0.001 |
| <b>20-29 years after first delivery</b>  |           |                   |                          |        |
| 0 APOs                                   | 15,719    | 217.8             | Reference                |        |
| 1 APO                                    | 7,345     | 284.1             | 1.29 (1.25, 1.32)        | <0.001 |
| 2 APOs                                   | 2,292     | 321.9             | 1.53 (1.47, 1.60)        | <0.001 |
| ≥3 APOs                                  | 1,181     | 420.1             | 1.95 (1.84, 2.08)        | <0.001 |
| Per each additional APO                  |           |                   | 1.25 (1.23, 1.27)        | <0.001 |
| <b>30-46 years after first delivery</b>  |           |                   |                          |        |
| 0 APOs                                   | 26,605    | 558.1             | Reference                |        |
| 1 APO                                    | 11,954    | 655.1             | 1.20 (1.18, 1.23)        | <0.001 |
| 2 APOs                                   | 3,425     | 701.9             | 1.37 (1.32, 1.42)        | <0.001 |
| ≥3 APOs                                  | 1,484     | 823.5             | 1.62 (1.53, 1.71)        | <0.001 |
| Per each additional APO                  |           |                   | 1.18 (1.16, 1.19)        | <0.001 |

<sup>a</sup>IHD incidence rate per 100,000 person-years.

<sup>b</sup>Adjusted for maternal age, year of delivery, parity, education, employment, income, country of origin, BMI, smoking, prior history of hypertension, diabetes, or hyperlipidemia, and all other APOs.

APO = adverse pregnancy outcome, CI = confidence interval, HR = hazard ratio, IHD = ischemic heart disease

**Supplemental Table 4. Summary of interaction results.**

| <b>Interaction</b> | <b>Additive</b>        | <b>Multiplicative</b>  |
|--------------------|------------------------|------------------------|
| PTD * SGA          | None ( $P=0.86$ )      | None ( $P=0.09$ )      |
| PTD * PEC          | Positive ( $P<0.001$ ) | None ( $P=0.18$ )      |
| PTD * OHD          | Positive ( $P=0.003$ ) | None ( $P=0.11$ )      |
| PTD * GD           | Positive ( $P<0.001$ ) | Positive ( $P=0.04$ )  |
| SGA * PEC          | None ( $P=0.99$ )      | None ( $P=0.06$ )      |
| SGA * OHD          | None ( $P=0.25$ )      | None ( $P=0.79$ )      |
| SGA * GD           | Negative ( $P=0.02$ )  | Negative ( $P<0.001$ ) |
| PEC * OHD          | None ( $P=0.24$ )      | Negative ( $P=0.002$ ) |
| PEC * GD           | Positive ( $P=0.003$ ) | None ( $P=0.15$ )      |
| OHD * GD           | None ( $P=0.19$ )      | Negative ( $P=0.009$ ) |

GD = gestational diabetes, OHD = other hypertensive disorders of pregnancy, PEC = preeclampsia, PTD = preterm delivery, SGA = small for gestational age infant

**Supplemental Table 5. Interactions between preterm delivery and preeclampsia (1973-2015) in relation to risk of ischemic heart disease through 2018, Sweden.**

|                                                                                         | Pregnancy duration      |                          |                                    |                          | HRs (95% CI) for preterm vs. full-term within preeclampsia strata |
|-----------------------------------------------------------------------------------------|-------------------------|--------------------------|------------------------------------|--------------------------|-------------------------------------------------------------------|
|                                                                                         | Full-term (39-41 wks)   |                          | Preterm (<37 wks)                  |                          |                                                                   |
|                                                                                         | No. (rate) <sup>a</sup> | HR (95% CI) <sup>b</sup> | No. (rate) <sup>a</sup>            | HR (95% CI) <sup>b</sup> |                                                                   |
| <b>Preeclampsia</b>                                                                     |                         |                          |                                    |                          |                                                                   |
| No                                                                                      | 43,518<br>(137.0)       | Reference                | 7,734<br>(197.3)                   | 1.33 (1.30, 1.36);       | 1.33 (1.30, 1.36);                                                |
| Yes                                                                                     | 5,076<br>(252.1)        | 1.37 (1.33, 1.41);       | 1,690<br>(297.4)                   | 1.90 (1.81, 1.99);       | 1.38 (1.31, 1.46);                                                |
| HRs (95% CI) associated with preeclampsia (yes vs. no) within pregnancy duration strata |                         | 1.37 (1.33, 1.41);       |                                    | 1.43 (1.35, 1.51);       |                                                                   |
| Interaction on additive scale: RERI (95% CI)                                            |                         |                          | 0.20 (0.10, 0.30); <i>P</i> <0.001 |                          |                                                                   |
| Interaction on multiplicative scale: HR ratio (95% CI)                                  |                         |                          | 1.04 (0.98, 1.11); <i>P</i> =0.18  |                          |                                                                   |

<sup>a</sup>Number of IHD cases (incidence rate per 100,000 person-years).

<sup>b</sup>Adjusted for maternal age, year of delivery, parity, education, employment, income, country of origin, BMI, smoking, prior history of hypertension, diabetes, or hyperlipidemia, and other adverse pregnancy outcomes (small for gestational age, other hypertensive disorders, gestational diabetes).

CI = confidence interval, HR = hazard ratio, IHD = ischemic heart disease, RERI = relative excess risk due to interaction



**Supplemental Table 6. Interactions between preterm delivery and other hypertensive disorders of pregnancy (1973-2015) in relation to risk of ischemic heart disease through 2018, Sweden.**

|                                                                                | Pregnancy duration      |                          |                         |                          | HRs (95% CI) for preterm vs. full-term within OHD strata |
|--------------------------------------------------------------------------------|-------------------------|--------------------------|-------------------------|--------------------------|----------------------------------------------------------|
|                                                                                | Full-term (39-41 wks)   |                          | Preterm (<37 wks)       |                          |                                                          |
|                                                                                | No. (rate) <sup>a</sup> | HR (95% CI) <sup>b</sup> | No. (rate) <sup>a</sup> | HR (95% CI) <sup>b</sup> |                                                          |
| <b>Other hypertensive disorders</b>                                            |                         |                          |                         |                          |                                                          |
| No                                                                             | 48,101<br>(143.7)       | Reference                | 9,100<br>(206.9)        | 1.33 (1.30, 1.36);       | 1.33 (1.30, 1.36);                                       |
| Yes                                                                            | 493<br>(161.3)          | 1.52 (1.39, 1.66);       | 324<br>(358.8)          | 2.29 (2.05, 2.57);       | 1.51 (1.30, 1.72);                                       |
| HRs (95% CI) associated with OHD (yes vs. no) within pregnancy duration strata |                         | 1.52 (1.39, 1.66);       |                         | 1.72 (1.62, 1.92);       |                                                          |
| Interaction on additive scale: RERI (95% CI)                                   |                         |                          | 0.44 (0.15, 0.73);      | <i>P</i> =0.003          |                                                          |
| Interaction on multiplicative scale: HR ratio (95% CI)                         |                         |                          | 1.13 (0.97, 1.30);      | <i>P</i> =0.11           |                                                          |

<sup>a</sup>Number of IHD cases (incidence rate per 100,000 person-years).

<sup>b</sup>Adjusted for maternal age, year of delivery, parity, education, employment, income, country of origin, BMI, smoking, prior history of hypertension, diabetes, or hyperlipidemia, and other adverse pregnancy outcomes (small for gestational age, preeclampsia, gestational diabetes).

CI = confidence interval, HR = hazard ratio, IHD = ischemic heart disease, OHD = other hypertensive disorders of pregnancy, RERI = relative excess risk due to interaction

**Supplemental Table 7. Interactions between preterm delivery and gestational diabetes (1973-2015) in relation to risk of ischemic heart disease through 2018, Sweden.**

|                                                                               | Pregnancy duration      |                          |                         |                          | HRs (95% CI) for preterm vs. full-term within GD strata |
|-------------------------------------------------------------------------------|-------------------------|--------------------------|-------------------------|--------------------------|---------------------------------------------------------|
|                                                                               | Full-term (39-41 wks)   |                          | Preterm (<37 wks)       |                          |                                                         |
|                                                                               | No. (rate) <sup>a</sup> | HR (95% CI) <sup>b</sup> | No. (rate) <sup>a</sup> | HR (95% CI) <sup>b</sup> |                                                         |
| <b>Gestational diabetes</b>                                                   |                         |                          |                         |                          |                                                         |
| No                                                                            | 48,047<br>(143.3)       | Reference                | 8,540<br>(199.3)        | 1.33 (1.30, 1.36);       | 1.33 (1.30, 1.36);                                      |
| Yes                                                                           | 547<br>(210.4)          | 1.26 (1.15, 1.37);       | 884<br>(434.5)          | 1.89 (1.75, 2.03);       | 1.50 (1.34, 1.66);                                      |
| HRs (95% CI) associated with GD (yes vs. no) within pregnancy duration strata |                         | 1.26 (1.15, 1.37);       |                         | 1.42 (1.31, 1.53);       |                                                         |
| Interaction on additive scale: RERI (95% CI)                                  |                         |                          | 0.30 (0.13, 0.47);      | <i>P</i> <0.001          |                                                         |
| Interaction on multiplicative scale: HR ratio (95% CI)                        |                         |                          | 1.13 (1.01, 1.25);      | <i>P</i> =0.04           |                                                         |

<sup>a</sup>Number of IHD cases (incidence rate per 100,000 person-years).

<sup>b</sup>Adjusted for maternal age, year of delivery, parity, education, employment, income, country of origin, BMI, smoking, prior history of hypertension, diabetes, or hyperlipidemia, and other adverse pregnancy outcomes (small for gestational age, preeclampsia, other hypertensive disorders).

CI = confidence interval, GD = gestational diabetes, HR = hazard ratio, IHD = ischemic heart disease, RERI = relative excess risk due to interaction

**Supplemental Table 8. Interactions between preeclampsia and gestational diabetes (1973-2015) in relation to risk of ischemic heart disease through 2018, Sweden.**

|                                                                         | Preeclampsia            |                                |                         |                                 | HRs (95% CI) for preeclampsia (yes vs. no) within GD strata |
|-------------------------------------------------------------------------|-------------------------|--------------------------------|-------------------------|---------------------------------|-------------------------------------------------------------|
|                                                                         | No. (rate) <sup>a</sup> | No<br>HR (95% CI) <sup>b</sup> | No. (rate) <sup>a</sup> | Yes<br>HR (95% CI) <sup>b</sup> |                                                             |
| <b>Gestational diabetes</b>                                             |                         |                                |                         |                                 |                                                             |
| No                                                                      | 71,908<br>(145.9)       | Reference                      | 9,633<br>(264.1)        | 1.39 (1.36, 1.42);              | 1.39 (1.36, 1.42);                                          |
| Yes                                                                     | 1,930<br>(306.0)        | 1.43 (1.36, 1.50);             | 410<br>(553.5)          | 2.16 (1.95, 2.39);              | 1.51 (1.35, 1.67);                                          |
| HRs (95% CI) associated with GD (yes vs. no) within preeclampsia strata |                         | 1.43 (1.36, 1.50);             |                         | 1.55 (1.39, 1.71);              |                                                             |
| Interaction on additive scale: RERI (95% CI)                            |                         |                                | 0.34 (0.12, 0.56);      | <i>P</i> =0.003                 |                                                             |
| Interaction on multiplicative scale: HR ratio (95% CI)                  |                         |                                | 1.09 (0.97, 1.21);      | <i>P</i> =0.15                  |                                                             |

<sup>a</sup>Number of IHD cases (incidence rate per 100,000 person-years).

<sup>b</sup>Adjusted for maternal age, year of delivery, parity, education, employment, income, country of origin, BMI, smoking, prior history of hypertension, diabetes, or hyperlipidemia, and other adverse pregnancy outcomes (preterm delivery, small for gestational age, other hypertensive disorders).

CI = confidence interval, GD = gestational diabetes, HR = hazard ratio, IHD = ischemic heart disease, RERI = relative excess risk due to interaction

**Supplemental Table 9. Associations between adverse pregnancy outcomes and subsequent risk of ischemic heart disease within 10 years following delivery, stratified on calendar year of delivery.**

|                              | IHD cases | Rate <sup>a</sup> | Reduced model <sup>b</sup><br>HR (95% CI) | Full model <sup>c</sup><br>HR (95% CI) |
|------------------------------|-----------|-------------------|-------------------------------------------|----------------------------------------|
| <b>1973-1979</b>             |           |                   |                                           |                                        |
| Preterm delivery             | 57        | 22.7              | 1.73 (1.28, 2.34)                         | 1.50 (1.10, 2.05)                      |
| Small for gestational age    | 98        | 13.0              | 1.67 (1.32, 2.10)                         | 1.64 (1.30, 2.07)                      |
| Preeclampsia                 | 68        | 16.4              | 1.47 (1.12, 1.92)                         | 1.47 (1.12, 1.93)                      |
| Other hypertensive disorders | 20        | 58.6              | 2.94 (1.94, 4.44)                         | 2.67 (1.79, 4.01)                      |
| Gestational diabetes         | 22        | 54.4              | 3.37 (2.20, 5.16)                         | 2.83 (1.82, 4.41)                      |
| <b>1980-1989</b>             |           |                   |                                           |                                        |
| Preterm delivery             | 129       | 27.1              | 2.31 (1.87, 2.87)                         | 2.06 (1.66, 2.56)                      |
| Small for gestational age    | 166       | 18.6              | 1.78 (1.48, 2.13)                         | 1.66 (1.39, 2.00)                      |
| Preeclampsia                 | 118       | 26.4              | 2.09 (1.69, 2.57)                         | 1.85 (1.50, 2.28)                      |
| Other hypertensive disorders | 28        | 82.0              | 4.12 (2.72, 6.22)                         | 3.74 (2.50, 5.61)                      |
| Gestational diabetes         | 22        | 38.6              | 2.48 (1.68, 3.65)                         | 2.04 (1.39, 2.99)                      |
| <b>1990-1999</b>             |           |                   |                                           |                                        |
| Preterm delivery             | 242       | 44.5              | 2.28 (1.94, 2.67)                         | 2.10 (1.78, 2.46)                      |
| Small for gestational age    | 194       | 24.1              | 1.14 (0.97, 1.33)                         | 1.06 (0.91, 1.24)                      |
| Preeclampsia                 | 117       | 45.1              | 2.03 (1.66, 2.47)                         | 1.68 (1.37, 2.05)                      |
| Other hypertensive disorders | 65        | 62.0              | 2.73 (2.14, 3.48)                         | 2.46 (1.93, 3.13)                      |
| Gestational diabetes         | 22        | 40.3              | 1.34 (0.95, 1.90)                         | 1.20 (0.85, 1.70)                      |
| <b>2000-2009</b>             |           |                   |                                           |                                        |
| Preterm delivery             | 356       | 75.2              | 1.75 (1.55, 1.98)                         | 1.62 (1.43, 1.84)                      |
| Small for gestational age    | 316       | 47.3              | 1.13 (1.00, 1.28)                         | 1.09 (0.96, 1.23)                      |
| Preeclampsia                 | 187       | 77.7              | 1.65 (1.41, 1.92)                         | 1.42 (1.22, 1.67)                      |
| Other hypertensive disorders | 101       | 110.0             | 2.13 (1.76, 2.58)                         | 2.00 (1.65, 2.42)                      |
| Gestational diabetes         | 87        | 90.2              | 1.49 (1.22, 1.83)                         | 1.34 (1.09, 1.65)                      |

<sup>a</sup>Ischemic heart disease incidence rate per 100,000 person-years.

<sup>b</sup>Adjusted for maternal age, year of delivery, parity, education, employment, income, country of origin, BMI, smoking, and prior history of hypertension, diabetes, or hyperlipidemia.

<sup>c</sup>Adjusted for the same covariates as above and all other adverse pregnancy outcomes.

CI = confidence interval, HR = hazard ratio, IHD = ischemic heart disease

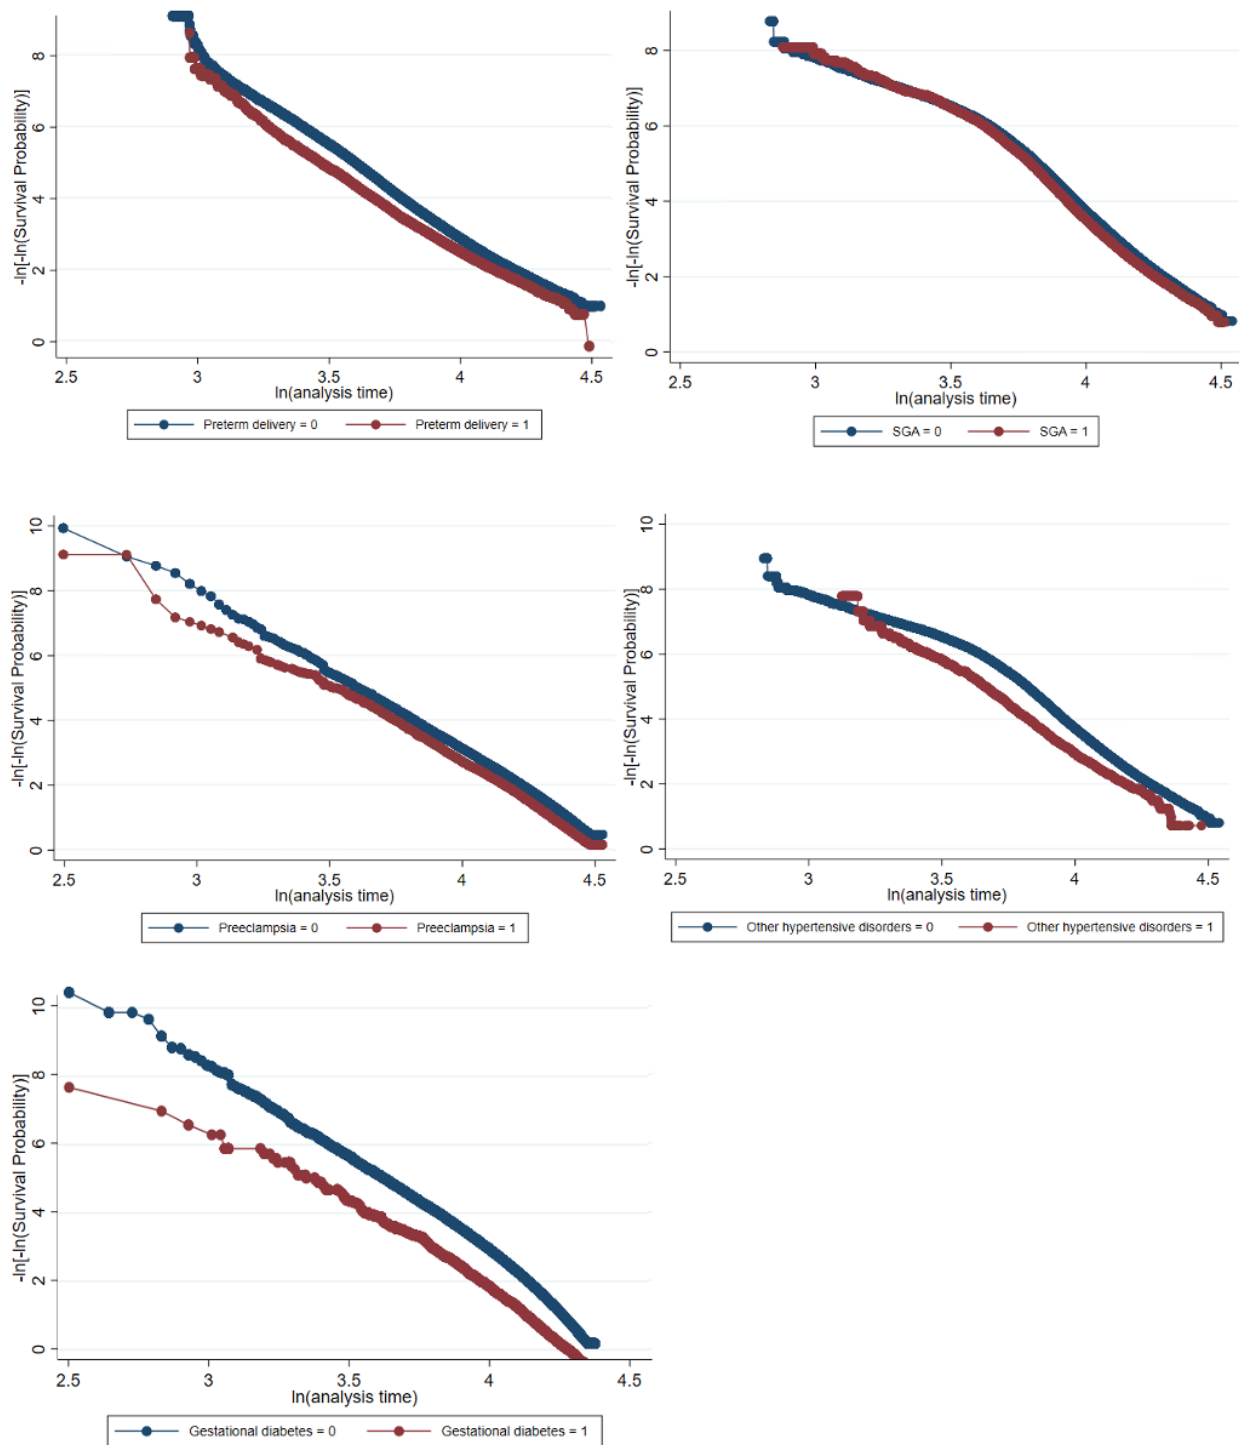

**Supplemental Figure 1. Log-log plots for associations between adverse pregnancy outcomes and subsequent risk of ischemic heart disease at 0-46 years of follow-up.**

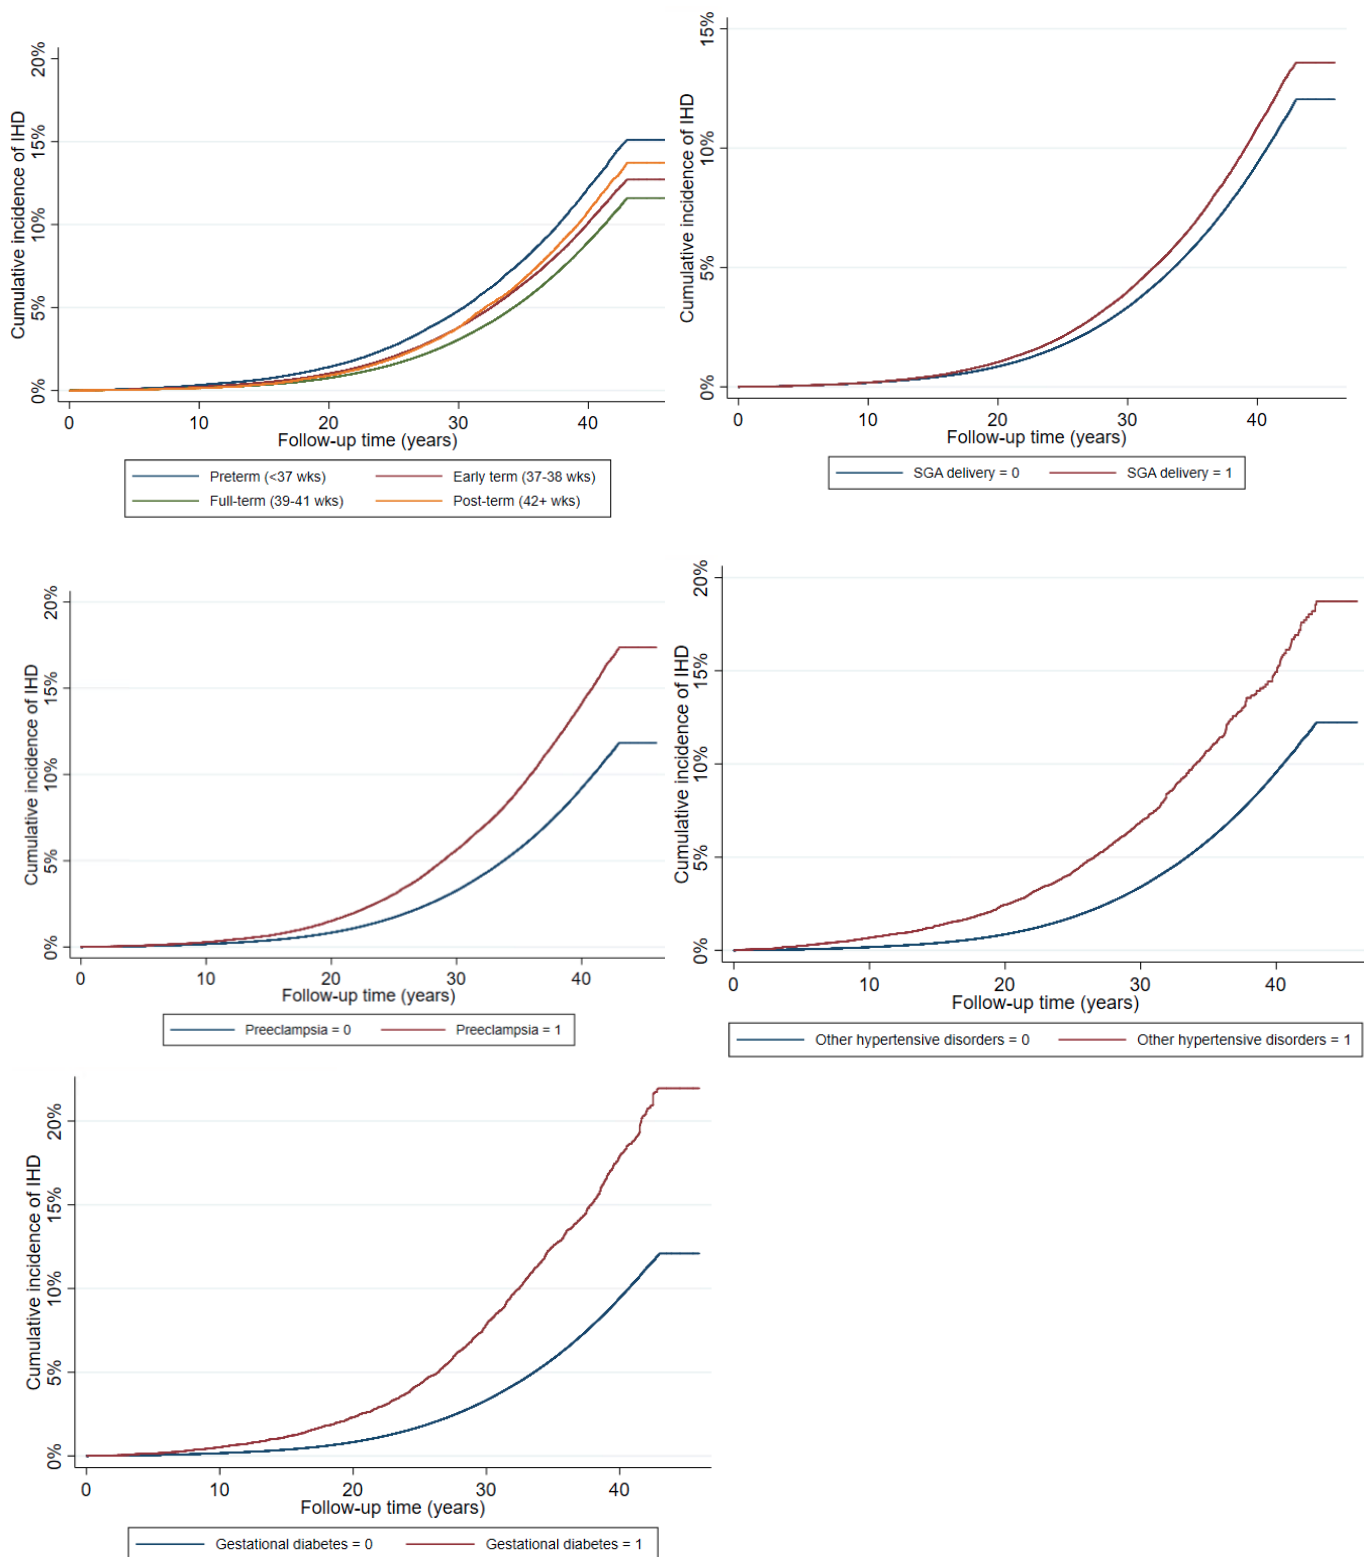

**Supplemental Figure 2. Cumulative incidence of ischemic heart disease at 0-46 years of follow-up associated with specific adverse pregnancy outcomes.**
